# Supplementary material for: A lysosome-targeting viscosity-sensitive fluorescent probe based on a novel functionalised near-infrared xanthene-indolium dye and its application in living cells
Source: Royal Society of Chemistry journal article supplement (doi:10.1039/d0tb01329c), 2020-01-01
Supplement: d0tb01329c1.pdf [file d0tb01329c1.pdf]

## Supporting Information

# A lysosome-targeting viscosity-sensitive fluorescent probe based on a novel functionalised near-infrared xanthene-indolium dye and its application in living cells

Chang Liu,<sup>a,b</sup> Tong Zhao,<sup>a,b</sup> Song He,<sup>a,b</sup> Liancheng Zhao<sup>a,b,c</sup> and Xianshun Zeng<sup>\*a,b</sup>

<sup>a</sup> Tianjin Key Laboratory for Photoelectric Materials and Devices, School of Materials Science & Engineering, Tianjin University of Technology, Tianjin 300384, China. Fax: (+86)22-60215226; Tel: (+86)22-60216748; E-mail: [xshzeng@tjut.edu.cn](mailto:xshzeng@tjut.edu.cn).

<sup>b</sup> Key Laboratory of Display Materials and Photoelectric Devices, Ministry of Education, School of Materials Science & Engineering, Tianjin University of Technology, Tianjin, 300384, China

<sup>c</sup> School of Materials Science and Engineering, Institute of Information Functional Materials & Devices, Harbin Institute of Technology, Harbin, 150001, China.

## Contents

Table S1. Fluorescent probes for viscosity reported in the literatures

Fig. S1. Absorption and fluorescence spectra of **Lyso-cy** in 95% glycerol and water

Fig. S2. The pH-dependence of absorption and fluorescence spectra of **Lyso-cy**

Fig. S3. The pH-dependence of the fluorescence intensity of **Lyso-cy** in 95% glycerol

Fig. S4. Fluorescence intensity changes  $[(F_i - F_{\text{Probe}})/(F_{95\% \text{Gly}} - F_{\text{probe}})]$  of **Lyso-cy** at 710 nm in the presence of other relevant species in water.

Fig. S5. Cytotoxicity of **Lyso-cy** in HeLa cells

Fig. S6 Rapamycin stimulated fluorescence increase of the probe **Lyso-cy**.

Fig. S7-Fig.S9 HRMS spectra and <sup>1</sup>H, <sup>13</sup>C NMR

## Materials and equipment

All chemicals and solvents used for synthesis were purchased from commercial suppliers and applied directly in the experiment without further purification. 3-(4, 5-dimethylthiazol-2-yl)-2, 5-diphenyltetrazolium bromide (MTT), Lyso-Tracker Green DND 26 and Mito-Tracker Green were purchased from Beyotime Institute of Biotechnology.  $^1\text{H}$  NMR and  $^{13}\text{C}$  NMR were measured on a Bruker AVANCE III HD 400MHz spectrometer. Chemical shifts (d values) were reported in ppm down field from internal  $\text{Me}_4\text{Si}$ . High resolution mass spectra (HRMS) were acquired on an Agilent 6510 Q-TOF LC/MS instrument (Agilent Technologies, Palo Alto, CA) equipped with an electrospray ionization (ESI) source. Melting points were recorded on a melting point apparatus (RY-2, Tianjin, China). UV-vis absorption spectra were obtained with UV-2550 (Shimadzu, Japan) spectrophotometer. A Hitachi F-4600 spectrophotometer (Tokyo, Japan) was used for fluorescence measurements with a 700 V PMT voltage. The pH values were reported by a Mettler Toledo Seven Excellence PH meter (Shanghai, China). The absorbance for MTT analysis was recorded on a microplate reader (PL-9602). The confocal microscopy imaging was used Olympus FV1000-IX81 inverted fluorescence microscope. Image processing was analyzed with Olympus software (FV1000-ASW) and Image J software.

## Detection of fluorescence quantum yield

Rhodamine B was used as a standard<sup>S1</sup> to calculate the relative fluorescence quantum yields according to the following equation:

$$\Phi_{\text{B}} = \Phi_{\text{I}}(F_{\text{B}}/F_{\text{I}})(A_{\text{I}}/A_{\text{B}})(\lambda_{\text{exI}}/\lambda_{\text{exB}})(\eta_{\text{B}}/\eta_{\text{I}})^2$$

Here,  $\Phi$  represents quantum yield; F stands for integrated area under the corrected emission spectrum; A is absorbance at the excitation wavelength;  $\lambda_{\text{ex}}$  is the excitation wavelength;  $\eta$  is the refractive index of the solution ; and the subscripts 1 and B refer to the unknown and the standard, respectively.

## Colocalization experiment in HeLa cells

Group 1: HeLa cells were pre-treated with the probe (0.2  $\mu\text{M}$ ) for 30 min and exposed to Rapamycin (2  $\mu\text{M}$ ) for another 30 min, then cells were treated with Lyso-Tracker Green (200 nM) for another 30 min.

Group 2: HeLa cells were pre-treated with the probe (0.2  $\mu\text{M}$ ) for 30 min and exposed to Nystatin (2  $\mu\text{M}$ ) for another 30 min, then cells were treated with Mito-Tracker Green (200 nM) for another 30 min.

**Table S1** Fluorescent probes for viscosity reported in the literatures.

| Probes                                                                                                                                | $\lambda_{em}(nm)$ | Targeted Localization | Response multiple | Journal <sup>S2-S6</sup>                         |
|---------------------------------------------------------------------------------------------------------------------------------------|--------------------|-----------------------|-------------------|--------------------------------------------------|
| 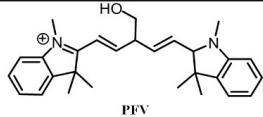<br>PFV                                              | 570                | Mitochondria          | >3-fold           | Dyes. Pigments. 2019, <b>168</b> , 134           |
| <br>NI-VIS                                           | 670                | Mitochondria          | 167-fold          | Anal. Chem. 2019, <b>91</b> , 10302              |
| <br>L1                                               | 535                | -                     | 14-fold           | Polyhedron. 2019, <b>170</b> , 440               |
| <br>L2                                              | 578                | -                     | 180-fold          | Polyhedron. 2019, <b>170</b> , 440               |
| <br>L3                                             | 603                | -                     | 120-fold          | Polyhedron. 2019, <b>170</b> , 440               |
| <br>MitoSN,<br>H <sub>3</sub> CH <sub>2</sub> COOC | 520                | Mitochondria          | 35-fold           | Spectrochim. Acta. A. 2018, <b>203</b> , 127.    |
| <br>Lys-VBOD                                       | 637                | Lysosome              | 3.7-fold          | Sens. Actuat. B Chem. 2020, <b>304</b> , 127271. |

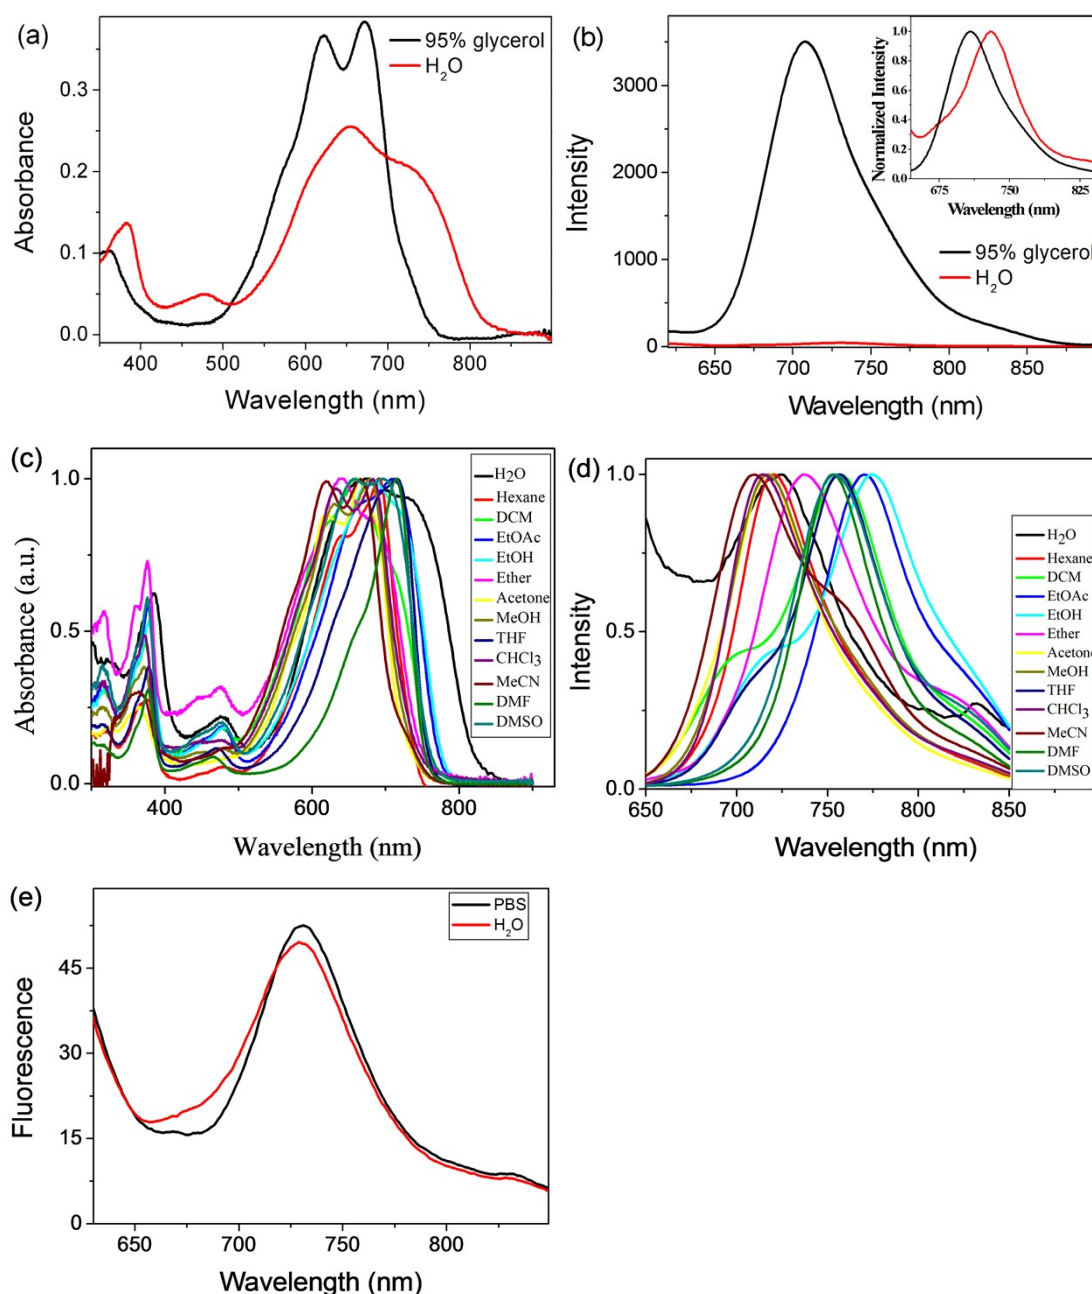

**Fig. S1** Absorption and fluorescence spectra of **Lyso-cy**. a) Absorption spectra of **Lyso-cy** (10  $\mu\text{M}$ ) and b) fluorescence spectra of **Lyso-cy** (5  $\mu\text{M}$ ) in 95% glycerol and water, respectively. c) Absorption spectra of **Lyso-cy** (10  $\mu\text{M}$ ) and d) fluorescence spectra of **Lyso-cy** (5  $\mu\text{M}$ ) in solvents with different polarity. e) fluorescence spectra of **Lyso-cy** (5  $\mu\text{M}$ ) in PBS buffer and water.  $\lambda_{\text{ex}} = 600 \text{ nm}$ , slit: 10 nm.

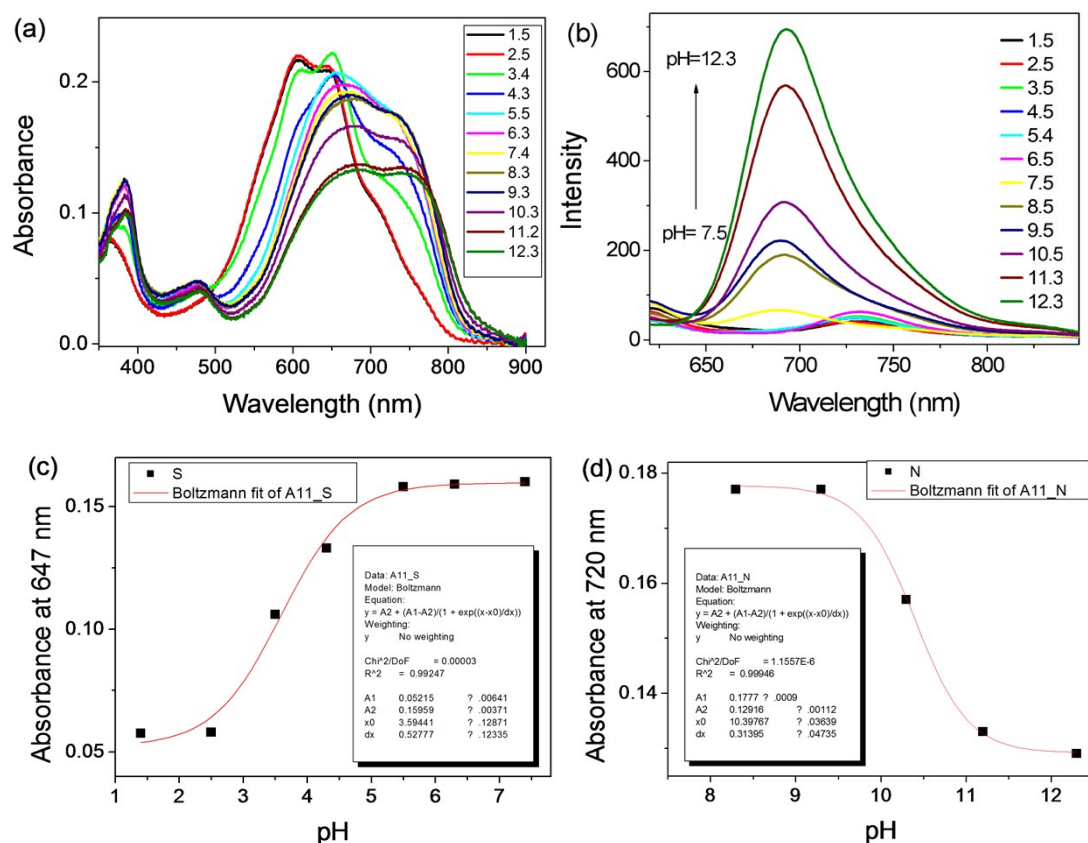

**Fig. S2** a) The pH-dependence of absorption spectra of **Lyso-cy** (10  $\mu$ M). b) pH-dependence of fluorescence spectra of **Lyso-cy** (5  $\mu$ M). c) Curve of absorbance at 647 nm of the probe versus increasing pH from 1.3 to 7.4. The pKa was deduced to be 3.59 (with correlation coefficient  $R^2 = 0.992$ ). d) Curve of absorbance at 720 nm of the probe versus increasing pH from 8.3 to 12.3. The pKa was deduced to be 10.39 (with correlation coefficient  $R^2 = 0.999$ ).  $\lambda_{ex} = 600$  nm, slit: 10 nm.

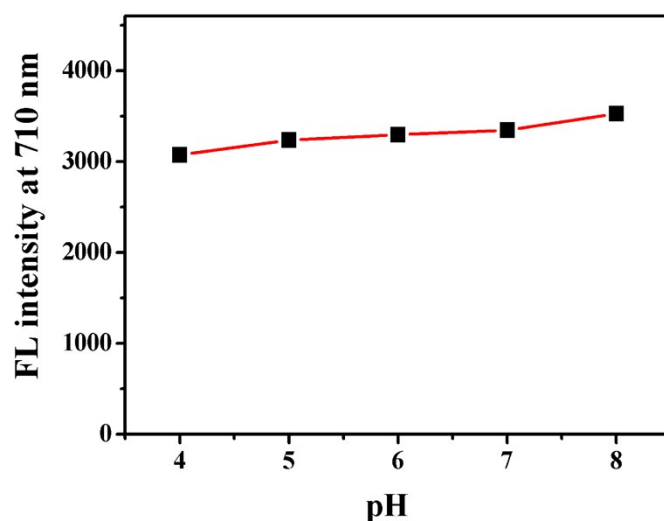

**Fig. S3** The pH-dependence of the fluorescence intensity of **Lyso-cy** (5  $\mu$ M) with 95% glycerol.  $\lambda_{ex} = 600$  nm, slit: 10 nm.

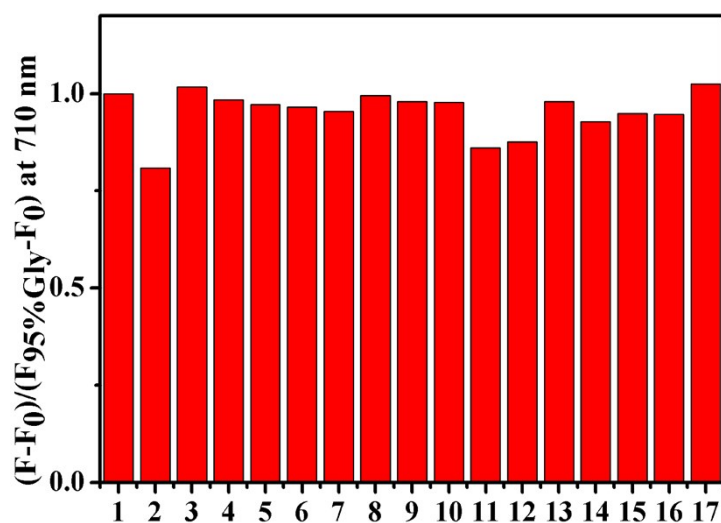

**Fig. S4** Fluorescence intensity changes  $[(F_i - F_{\text{Probe}})/(F_{95\% \text{Gly}} - F_{\text{probe}})]$  of the probe **Lyso-cy** (5  $\mu\text{M}$ ) at 710 nm in the presence of other relevant species (10 equiv.) in water. 1: **Lyso-cy** in 95% glycerol, 2: **Lyso-cy** +  $\text{NaNO}_2$ , 3: **Lyso-cy** +  $\text{AgNO}_3$ , 4: **Lyso-cy** +  $\text{MgCl}_2$ , 5: **Lyso-cy** +  $\text{CaCl}_2$ , 6: **Lyso-cy** +  $\text{Fe}(\text{NO}_3)_2$ , 7: **Lyso-cy** +  $\text{Ni}(\text{NO}_3)_2$ , 8: **Lyso-cy** +  $\text{Hg}(\text{NO}_3)_2$ , 9: **Lyso-cy** +  $\text{Zn}(\text{NO}_3)_2$ , 10: **Lyso-cy** +  $\text{Cu}(\text{NO}_3)_2$ , 11: **Lyso-cy** + GSH, 12: **Lyso-cy** + Hcy, 13: **Lyso-cy** + Cys, 14: **Lyso-cy** +  $\text{ClO}^-$ , 15: **Lyso-cy** +  $\text{ONOO}^-$ , 16: **Lyso-cy** +  $\text{H}_2\text{O}_2$  and 17: **Lyso-cy** + TBHP;  $\lambda_{\text{ex}} = 600 \text{ nm}$ ; slit: 10 nm.

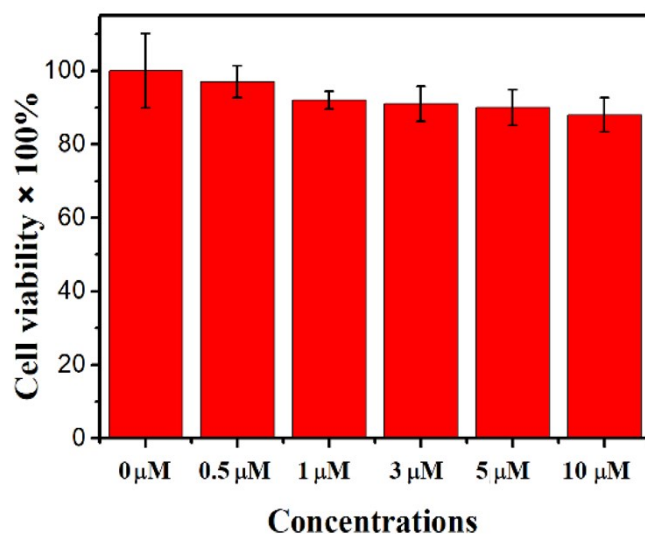

**Fig. S5** Cytotoxicity of **Lyso-cy** in HeLa cells. The cells were incubated with **Lyso-cy** at corresponding concentrations (0  $\mu\text{M}$ , 0.5  $\mu\text{M}$ , 1  $\mu\text{M}$ , 3  $\mu\text{M}$ , 5  $\mu\text{M}$ , 10  $\mu\text{M}$ ) for 24 h.

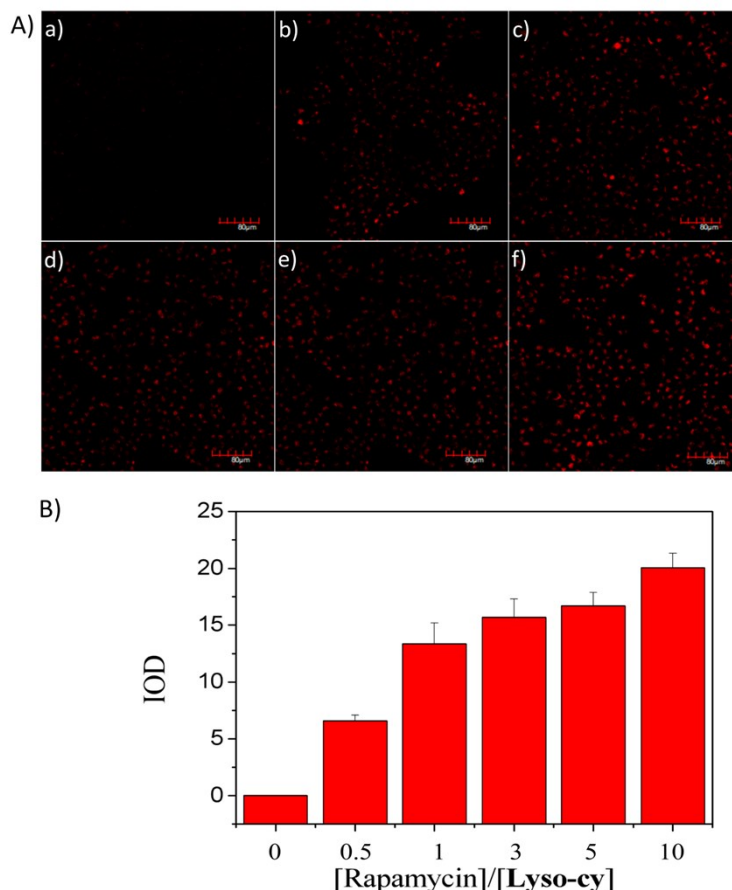

**Fig. S6** Rapamycin stimulated fluorescence increase of the probe **Lyso-cy**. A) Fluorescence imaging of **Lyso-cy** in HeLa cells. The cells were treated with **Lyso-cy** (1 μM) for 30 min, washed with PBS, and then incubated with different concentrations of Rapamycin (0-10 μM) for 20 min, respectively. Concentrations of Rapamycin, a): 0 μM, b): 0.5 μM, c): 1.0 μM, d): 3.0 μM, e): 5.0 μM, f): 10.0 μM. Red channel:  $\lambda_{\text{ex}} = 635 \text{ nm}$ ,  $\lambda_{\text{em}} = 670\text{-}770 \text{ nm}$ . Scale bar: 80 μm. B) Relative fluorescence intensities of HeLa in panels (a)-(f).

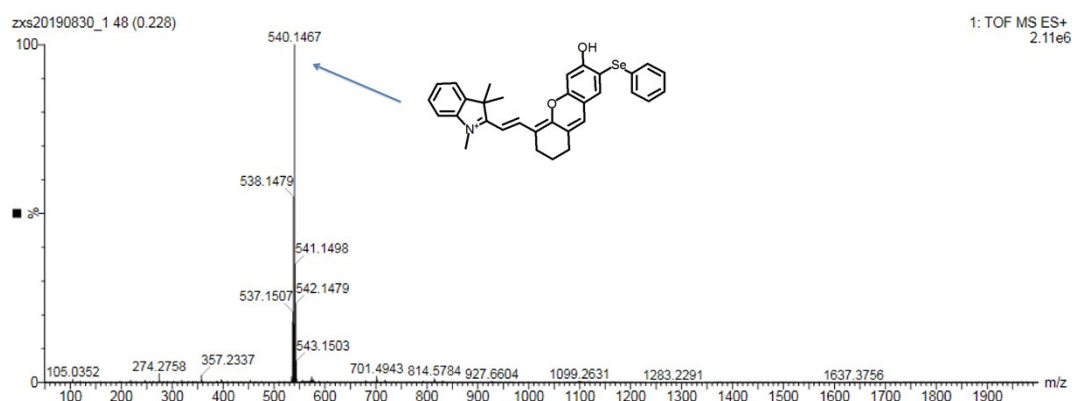

**Fig. S7** HRMS (LC/MS) spectra of **Lyso-cy**. The peak at  $m/z = 540.1467$  was assigned to the mass of  $[\text{Lyso-cy} - \text{BF}_4]^+$ .

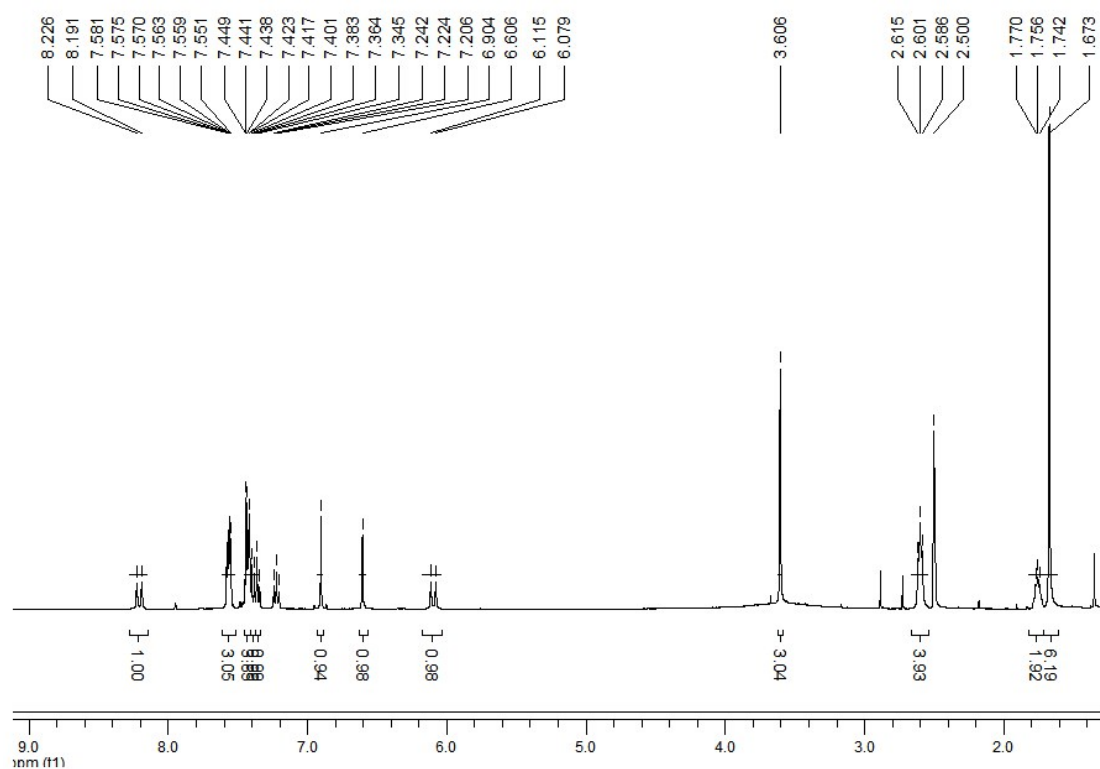

**Fig. S8** <sup>1</sup>H NMR of Lyso-cy (400 MHz, DMSO-*d*<sub>6</sub>).

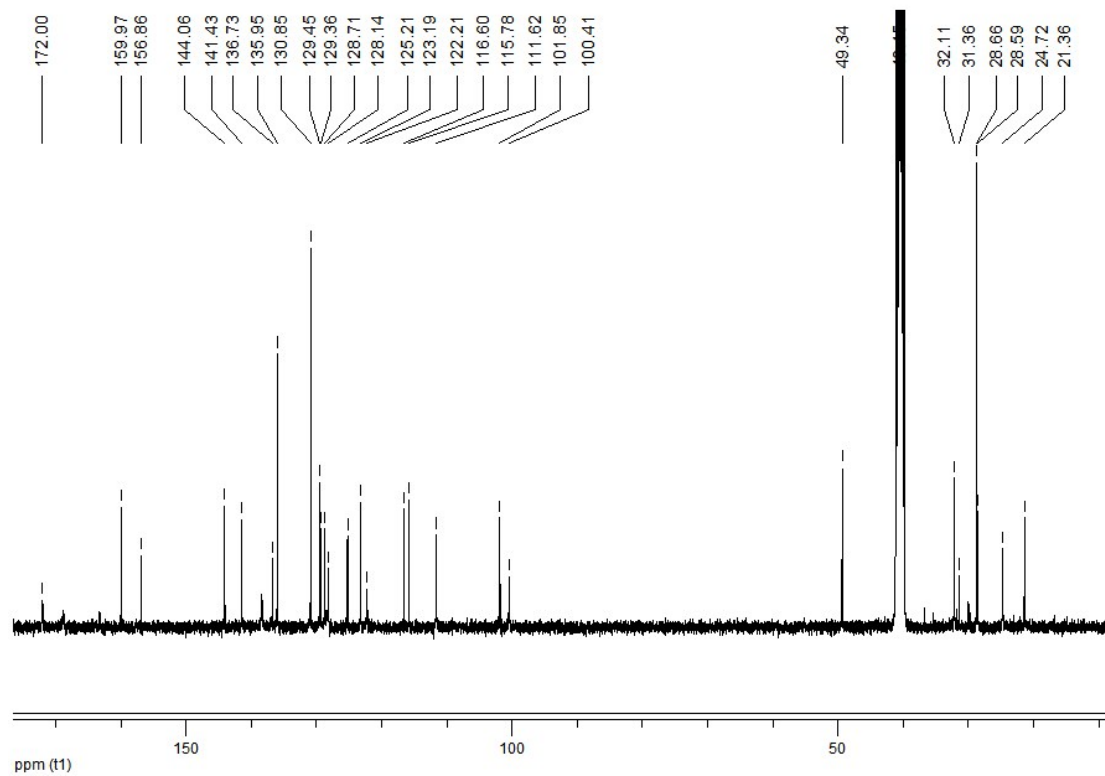

**Fig. S9** <sup>13</sup>C NMR of Lyso-cy (100 MHz, DMSO-*d*<sub>6</sub>).



## Reference

- S1 J. G. Huang, J. C. Li, Y. L. Q. Q. Miao and K. Y. Pu, *Nat. Mater.*, 2019, **18**, 1133.
- S2 Y. L. Wu, W. Shu, C. Y. Zeng, B. P. Guo, J. W. Shi, J X. Jing, L. and Zhang, *Dyes Pigments.*, 2019, **168**, 134-139.
- S3 Y. Y. Zhang, Z. Li, W. Hu, Z. H. Liu, *Anal. Chem.*, 2019, **91**, 10302-10309.
- S4 H. Wang, F. Z. Cai, L. Zhou, D. Li, D. X. Feng, Y. Z. J. Wei, Feng, X. X. Gu, X. Z. Li, and Y. J. Wu, *Polyhedron*. 2019, **170**, 440-446.
- S5 H. Wang, B. Fang, L. F. Xiao, D. Li, L. Zhou, L. Kong, Y. Yu, X. Z. Li, Y. J. Wu, and Z. J. Hu, *Spectrochim. Acta. A.*, 2018, **203**, 127-131.
- S6 B. Shen, L. F. Wang, X. Zhi, and Y. Qian, *Sens. Actuat. B Chem.*, 2020, **304**, 127271.
